# Supplementary material for: Oxygen reduction reaction (ORR) in alkaline solution catalysed by an atomically precise catalyst based on a Pd(ii) complex supported on multi-walled carbon nanotubes (MWCNTs). Electrochemical and structural considerations
Source: Royal Society of Chemistry journal article supplement (doi:10.1039/d3dt03947a), 2024-01-01
Supplement: d3dt03947a1.pdf [file d3dt03947a1.pdf]

## Electronic Supplementary Materials

### Oxygen reduction reaction (ORR) in alkaline solution catalysed by an atomically precise catalyst based on a Pd(II) complex supported on multi walled carbon nanotubes (MWCNTs). Electrochemical and structural considerations.

Valeria Monini, Marco Bonechi, Carla Bazzicalupi, Antonio Bianchi, Pietro Gentilesca, Walter Giurlani, Massimo Innocenti, Arianna Meoli, Giammarco Maria Romano and Matteo Savastano

|                                                                                                                                                                                                                                                                                                                                                                                                                           |     |
|---------------------------------------------------------------------------------------------------------------------------------------------------------------------------------------------------------------------------------------------------------------------------------------------------------------------------------------------------------------------------------------------------------------------------|-----|
| <b>Figure S1.</b> Experimental calibration curve for the determination of H <sub>2</sub> L concentration in solution.                                                                                                                                                                                                                                                                                                     | S2  |
| <b>Table S1.</b> Crystal data and refinement parameters for (H <sub>5</sub> L)(ClO <sub>4</sub> ) <sub>3</sub> ·2H <sub>2</sub> O, (H <sub>3</sub> L)(H <sub>4</sub> L)(ClO <sub>4</sub> ) <sub>3</sub> ·11H <sub>2</sub> O, [Cu(H <sub>2</sub> L)(H <sub>2</sub> O)](ClO <sub>4</sub> ) <sub>2</sub> ·10.46H <sub>2</sub> O, [Cu(H <sub>2</sub> L)Cl]Cl·3H <sub>2</sub> O and [Pd(1)]Cl <sub>2</sub> ·4H <sub>2</sub> O. | S3  |
| <b>Table S2.</b> Selected bond distances (Å) and angles (deg) for metal coordination environment in [Cu(H <sub>2</sub> L)(H <sub>2</sub> O)](ClO <sub>4</sub> ) <sub>2</sub> ·10.46H <sub>2</sub> O and (d) [Cu(H <sub>2</sub> L)Cl]Cl·3H <sub>2</sub> O.                                                                                                                                                                 | S3  |
| <b>Table S3.</b> Selected bond distances (Å) and angles (deg) for metal coordination environment in [Pd(1)]Cl <sub>2</sub> ·4H <sub>2</sub> O.                                                                                                                                                                                                                                                                            | S4  |
| <b>Figure S2.</b> Superposition of H <sub>2</sub> L ligands in the crystal structures of (H <sub>5</sub> L)(ClO <sub>4</sub> ) <sub>3</sub> ·2H <sub>2</sub> O, (H <sub>3</sub> L)(H <sub>4</sub> L)(ClO <sub>4</sub> ) <sub>3</sub> ·11H <sub>2</sub> O, [Cu(H <sub>2</sub> L)(H <sub>2</sub> O)](ClO <sub>4</sub> ) <sub>2</sub> ·10.46H <sub>2</sub> O and [Cu(H <sub>2</sub> L)Cl]Cl·3H <sub>2</sub> O.               | S5  |
| <b>Figure S3.</b> Preliminary results from molecular mechanics simulation for the [(H <sub>2</sub> L)Pd] <sup>2+</sup> cation interacting with a graphene slice as a model for the MWCNT.                                                                                                                                                                                                                                 | S6  |
| <b>Figure S4.</b> Superimposition of the two not symmetry equivalent [Pd(1)] <sup>2+</sup> complexes in the [Pd(1)]Cl <sub>2</sub> ·4H <sub>2</sub> O crystal structure.                                                                                                                                                                                                                                                  | S7  |
| <b>Figure S5.</b> SEM micrographs showing MWCNT before functionalisation, MWCNT-L and as-prepared MWCNT-LPd.                                                                                                                                                                                                                                                                                                              | S8  |
| <b>Figure S6.</b> SEM-EDS analysis. Spectra and % m/m of MWCNT before functionalisation, MWCNT-L and as-prepared MWCNT-LPd.                                                                                                                                                                                                                                                                                               | S9  |
| <b>Figure S7.</b> XPS Analysis of MWCNT-LPd catalyst.                                                                                                                                                                                                                                                                                                                                                                     | S10 |
| <b>Figure S8.</b> Cyclic voltammetry of modified electrodes in KOH 0.1M solution saturated with N <sub>2</sub> and O <sub>2</sub> between +0.2 and -0.75 V at a potential scan rate of 5 mVs <sup>-1</sup> : MWCNT-L-Pd, MWCNT-L, MWCNT, benchmark GC electrode, benchmark Pt electrode.                                                                                                                                  | S11 |
| <b>Figure S9.</b> LSV ring and disk current density, 1600 rpm rotation rate, 5 mVs <sup>-1</sup> scan rate, in KOH 0.1 M N <sub>2</sub> and O <sub>2</sub> saturated solution: MWCNT-LPd, MWCNT-L, MWCNT, benchmark GC electrode, benchmark Pt electrode.                                                                                                                                                                 | S12 |
| <b>Figure S10.</b> LSV ring and disk current density, 1600 rpm rotation rate, 5 mVs <sup>-1</sup> scan rate, in K <sub>3</sub> Fe(CN) <sub>6</sub> 1 mM, KCl 0.1 M O <sub>2</sub> free solution: MWCNT-LPd (N = 0.38), MWCNT-L (N = 0.32), MWCNT (N = 0.32), benchmark GC electrode (N = 0.38), benchmark Pt electrode (N = 0.38).                                                                                        | S13 |
| <b>Figure S11.</b> Short-time stability test (galvanostatic RRDE experiment) of ORR electrocatalytic performance.                                                                                                                                                                                                                                                                                                         | S14 |

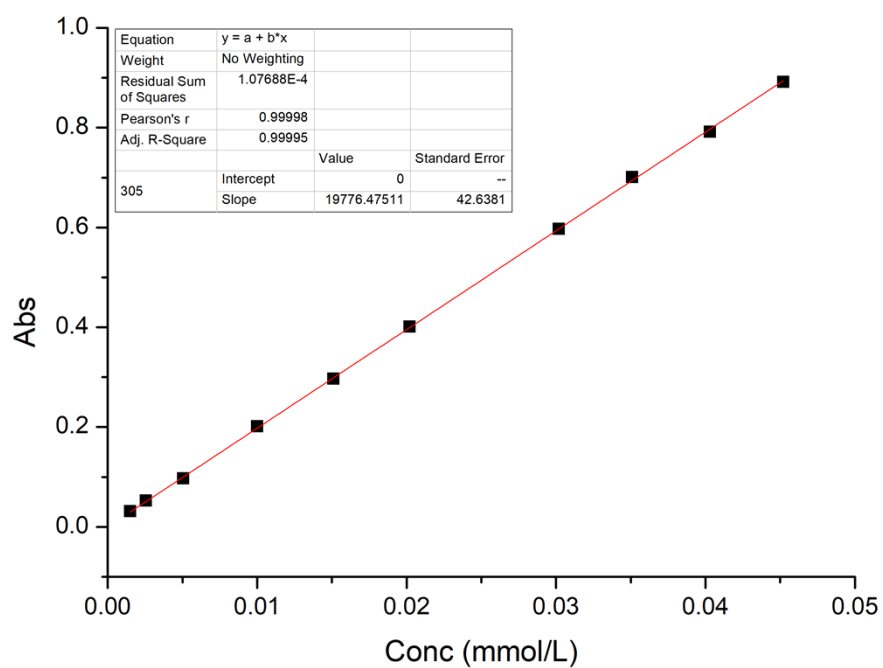

**Figure S1.** Experimental calibration curve for the determination of H<sub>2</sub>L concentration in solution obtained with the absorbance at 305 nm. Determined molar absorbance  $\epsilon = 19776(43) \text{ L}\cdot\text{mol}^{-1}\cdot\text{cm}^{-1}$

**Table S1.** Crystal data and refinement parameters for (H<sub>5</sub>L)(ClO<sub>4</sub>)<sub>3</sub>·2H<sub>2</sub>O (a), (H<sub>3</sub>L)(H<sub>4</sub>L)(ClO<sub>4</sub>)<sub>3</sub>·11H<sub>2</sub>O (b), [Cu(H<sub>2</sub>L)(H<sub>2</sub>O)](ClO<sub>4</sub>)<sub>2</sub>·10.46H<sub>2</sub>O (c), [Cu(H<sub>2</sub>L)Cl]Cl·3H<sub>2</sub>O (d) and [Pd(1)]Cl<sub>2</sub>·4H<sub>2</sub>O (e)

|                                    | (a)                                                                             | (b)                                                                              | (c)                                                                                     | (d)                                                                              | (e)                                                                                                            |
|------------------------------------|---------------------------------------------------------------------------------|----------------------------------------------------------------------------------|-----------------------------------------------------------------------------------------|----------------------------------------------------------------------------------|----------------------------------------------------------------------------------------------------------------|
| Empirical formula                  | C <sub>24</sub> H <sub>49</sub> Cl <sub>3</sub> N <sub>14</sub> O <sub>18</sub> | C <sub>48</sub> H <sub>109</sub> Cl <sub>3</sub> N <sub>28</sub> O <sub>31</sub> | C <sub>24</sub> H <sub>64.92</sub> Cl <sub>2</sub> CuN <sub>14</sub> O <sub>23.46</sub> | C <sub>24</sub> H <sub>48</sub> Cl <sub>2</sub> CuN <sub>14</sub> O <sub>7</sub> | C <sub>56</sub> H <sub>96</sub> Cl <sub>4</sub> N <sub>12</sub> O <sub>16</sub> Pd <sub>2</sub> S <sub>4</sub> |
| Formula weight                     | 928.12                                                                          | 1680.98                                                                          | 1059.62                                                                                 | 779.20                                                                           | 1676.28                                                                                                        |
| Temperature (K)                    | 100(2)                                                                          | 100(2)                                                                           | 100(2)                                                                                  | 100(2)                                                                           | 100(2)                                                                                                         |
| Crystal system                     | Triclinic                                                                       | Monoclinic                                                                       | Triclinic                                                                               | Triclinic                                                                        | Triclinic                                                                                                      |
| space group                        | <i>P</i> -1                                                                     | <i>C</i> 2/ <i>c</i>                                                             | <i>P</i> -1                                                                             | <i>P</i> -1                                                                      | <i>P</i> -1                                                                                                    |
| a (Å)                              | 12.5685(3)                                                                      | 36.1345(14)                                                                      | 9.5546(3)                                                                               | 10.7356(14)                                                                      | 9.8464(3)                                                                                                      |
| b (Å)                              | 12.8470(3)                                                                      | 8.3617(3)                                                                        | 12.9018(4)                                                                              | 13.2246(16)                                                                      | 18.5362(7)                                                                                                     |
| c (Å)                              | 12.9863(3)                                                                      | 25.1795(10)                                                                      | 19.4955(6)                                                                              | 13.6742(16)                                                                      | 21.2826(8)                                                                                                     |
| α (°)                              | 74.359(1)                                                                       | 90                                                                               | 74.443(2)                                                                               | 62.602(4)                                                                        | 97.607(2)                                                                                                      |
| β (°)                              | 86.816(1)                                                                       | 92.056(3)                                                                        | 79.300(2)                                                                               | 75.161(5)                                                                        | 99.894(2)                                                                                                      |
| γ (°)                              | 76.531(1)                                                                       | 90                                                                               | 76.145(2)                                                                               | 80.721(5)                                                                        | 100.807(2)                                                                                                     |
| Volume (Å <sup>3</sup> )           | 1963.62(8)                                                                      | 7603.0(5)                                                                        | 2228.81(12)                                                                             | 1664.0(4)                                                                        | 3704.0(2)                                                                                                      |
| Z                                  | 2                                                                               | 4                                                                                | 2                                                                                       | 2                                                                                | 2                                                                                                              |
| Independent reflections / R(int)   | 7214/0.0747                                                                     | 8184/0.0845                                                                      | 7832/0.0703                                                                             | 10201/0.0913                                                                     | 10301/0.0946                                                                                                   |
| μ (mm <sup>-1</sup> )              | 2.934<br>(Cu-kα)                                                                | 1.966<br>(Cu-kα)                                                                 | 2.665<br>(Cu-kα)                                                                        | 0.883<br>(Mo-kα)                                                                 | 6.872<br>(Cu-kα)                                                                                               |
| R indices [ I>2σ(I) ] <sup>a</sup> | R1 = 0.0904                                                                     | R1 = 0.0793                                                                      | R1 = 0.0602                                                                             | R1 = 0.0757                                                                      | R1 = 0.0874                                                                                                    |
|                                    | wR2 = 0.2432                                                                    | wR2 = 0.2294                                                                     | wR2 = 0.1727                                                                            | wR2 = 0.1867                                                                     | wR2 = 0.2264                                                                                                   |
| R indices (all data) <sup>a</sup>  | R1 = 0.1051                                                                     | R1 = 0.0869                                                                      | R1 = 0.0659                                                                             | R1 = 0.0998                                                                      | R1 = 0.1327                                                                                                    |
|                                    | wR2 = 0.2577                                                                    | wR2 = 0.2401                                                                     | wR2 = 0.1798                                                                            | wR2 = 0.2069                                                                     | wR2 = 0.2643                                                                                                   |

$$^a R1 = \sum || Fo | - |Fc | | / \sum |Fo | ; wR2 = [ \sum w(Fo^2 - Fc^2)^2 / \sum wF$$

**Table S2.** Selected bond distances (Å) and angles (deg) for metal coordination environment in [Cu(H<sub>2</sub>L)(H<sub>2</sub>O)](ClO<sub>4</sub>)<sub>2</sub>·10.46H<sub>2</sub>O and (d) [Cu(H<sub>2</sub>L)Cl]Cl·3H<sub>2</sub>O

| [Cu(H <sub>2</sub> L)(H <sub>2</sub> O)](ClO <sub>4</sub> ) <sub>2</sub> ·10.46H <sub>2</sub> O |          | [Cu(H <sub>2</sub> L)Cl]Cl·3H <sub>2</sub> O |          |
|-------------------------------------------------------------------------------------------------|----------|----------------------------------------------|----------|
| Cu - OW1                                                                                        | 2.130(3) | Cu - Cl1                                     | 2.411(1) |
| Cu - N4                                                                                         | 2.030(3) | Cu - N1                                      | 2.075(4) |
| Cu - N2                                                                                         | 2.041(3) | Cu - N3                                      | 2.072(4) |
| Cu - N1                                                                                         | 2.042(3) | Cu - N2                                      | 2.042(5) |
| Cu - N3                                                                                         | 2.048(3) | Cu - N4                                      | 2.031(5) |
|                                                                                                 |          |                                              |          |
| OW1 - Cu - N4                                                                                   | 103.9(1) | Cl1 - Cu - N1                                | 106.3(1) |
| OW1 - Cu - N2                                                                                   | 102.6(1) | Cl1 - Cu - N3                                | 104.5(1) |
| OW1 - Cu - N1                                                                                   | 104.5(1) | Cl1 - Cu - N2                                | 105.3(1) |
| OW1 - Cu - N3                                                                                   | 104.4(1) | Cl1 - Cu - N4                                | 105.1(1) |
| N4 - Cu - N2                                                                                    | 153.5(1) | N1 - Cu - N3                                 | 149.2(1) |
| N4 - Cu - N1                                                                                    | 86.6(1)  | N1 - Cu - N2                                 | 85.2(2)  |
| N4 - Cu - N3                                                                                    | 86.6(1)  | N1 - Cu - N4                                 | 85.7(1)  |
| N2 - Cu - N1                                                                                    | 86.8(1)  | N3 - Cu - N2                                 | 87.0(2)  |
| N2 - Cu - N3                                                                                    | 86.9(1)  | N3 - Cu - N4                                 | 86.2(2)  |
| N1 - Cu - N3                                                                                    | 151.1(1) | N2 - Cu - N4                                 | 149.6(2) |

**Table S3.** Selected bond distances (Å) and angles (deg) for metal coordination environment in [Pd(1)]Cl<sub>2</sub>·4H<sub>2</sub>O

| Mol A         |          | Mol B          |          |
|---------------|----------|----------------|----------|
|               |          |                |          |
| Pd1 - N2      | 2.038(8) | Pd2 - N7       | 2.04(1)  |
| Pd1 - N3      | 2.06(1)  | Pd2 - N8       | 2.036(9) |
| Pd1 - N1      | 2.05(1)  | Pd2 - N10      | 2.058(9) |
| Pd1 - N4      | 2.037(9) | Pd2 - N9       | 2.03(1)  |
| Pd1...N6      | 3.09(1)  | Pd2...N11      | 3.00(1)  |
|               |          |                |          |
| N2 - Pd1 - N3 | 88.1(4)  | N7 - Pd2 - N8  | 88.1(4)  |
| N2 - Pd1 - N1 | 87.2(4)  | N7 - Pd2 - N10 | 87.7(4)  |
| N2 - Pd1 - N4 | 158.3(4) | N7 - Pd2 - N9  | 159.6(4) |
| N3 - Pd1 - N1 | 158.5(4) | N8 - Pd2 - N10 | 157.9(4) |
| N3 - Pd1 - N4 | 88.3(4)  | N8 - Pd2 - N9  | 88.1(4)  |
| N1 - Pd1 - N4 | 88.4(4)  | N10 - Pd2 - N9 | 88.3(4)  |
|               |          |                |          |
|               |          |                |          |
|               |          |                |          |

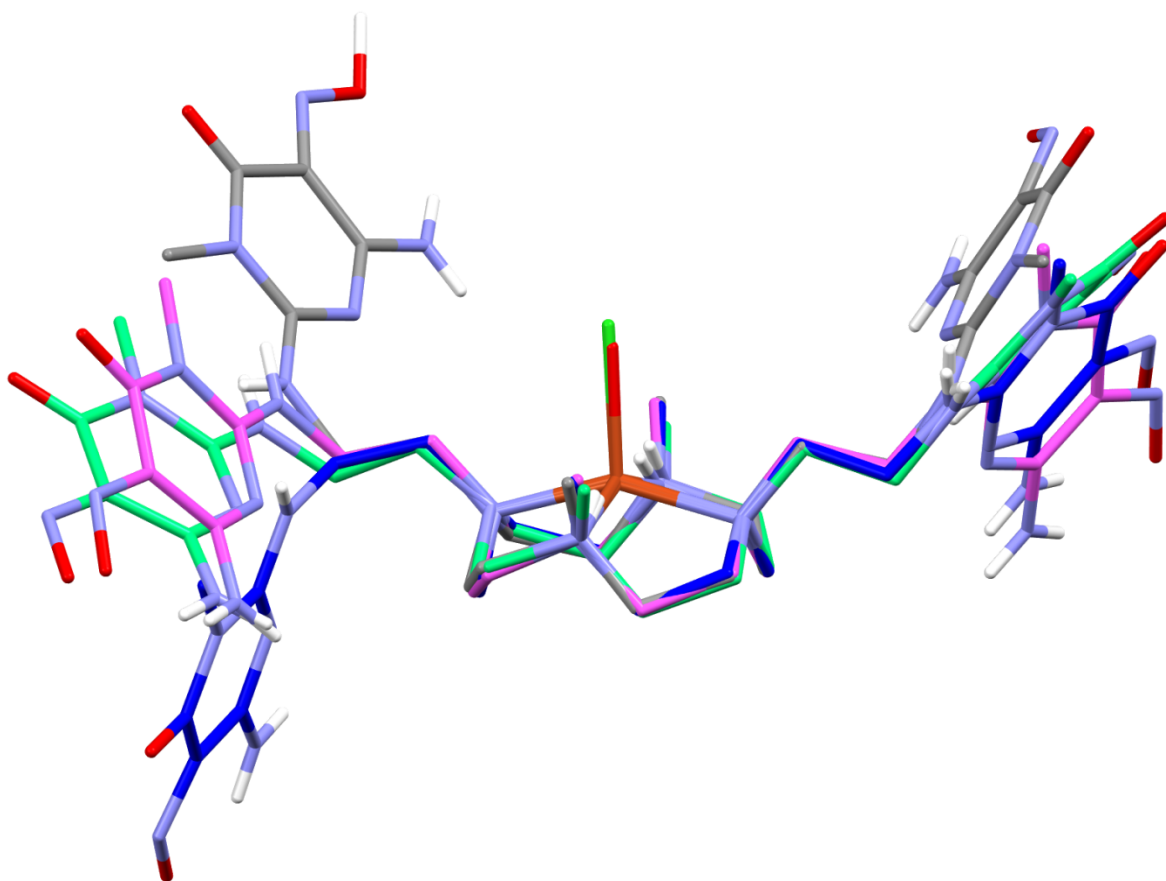

**Figure S2.** Superposition of H<sub>2</sub>L ligands in the crystal structures of (H<sub>5</sub>L)(ClO<sub>4</sub>)<sub>3</sub>·2H<sub>2</sub>O (gray), (H<sub>3</sub>L)(H<sub>4</sub>L)(ClO<sub>4</sub>)<sub>3</sub>·11H<sub>2</sub>O (green – only the prevalent conformer is shown), [Cu(H<sub>2</sub>L)(H<sub>2</sub>O)](ClO<sub>4</sub>)<sub>2</sub>·10.46H<sub>2</sub>O (pink) and [Cu(H<sub>2</sub>L)Cl]Cl·3H<sub>2</sub>O (blue).

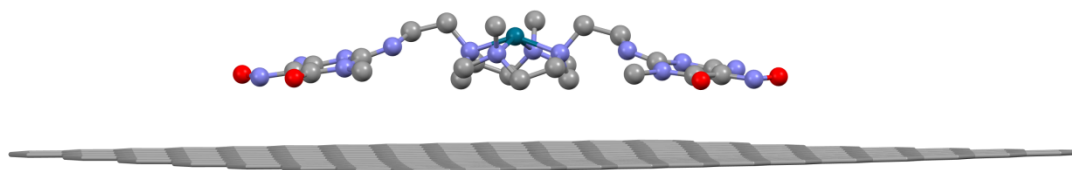

**Figure S3.** Preliminary results from molecular dynamics simulation (empirical forcefield method) for the  $[\text{Pd}(\text{H}_2\text{L})]^{2+}$  cation interacting with a graphene slice as a model for the MWCNT (HyperChem(TM) Professional 8, Hypercube, Inc., 1115 NW 4th Street, Gainesville, Florida 32601, USA).

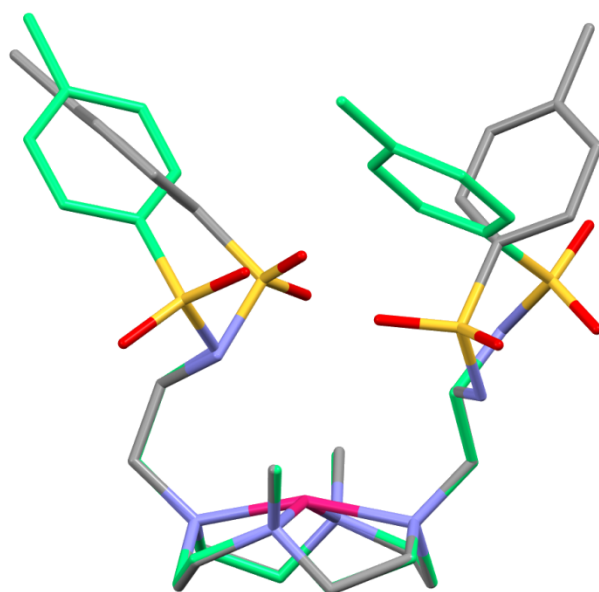

**Figure S4.** Superimposition of the two not symmetry equivalent  $[\text{Pd}(\mathbf{1})]^{2+}$  complexes in the  $[\text{Pd}(\mathbf{1})]\text{Cl}_2 \cdot 4\text{H}_2\text{O}$  crystal structure.

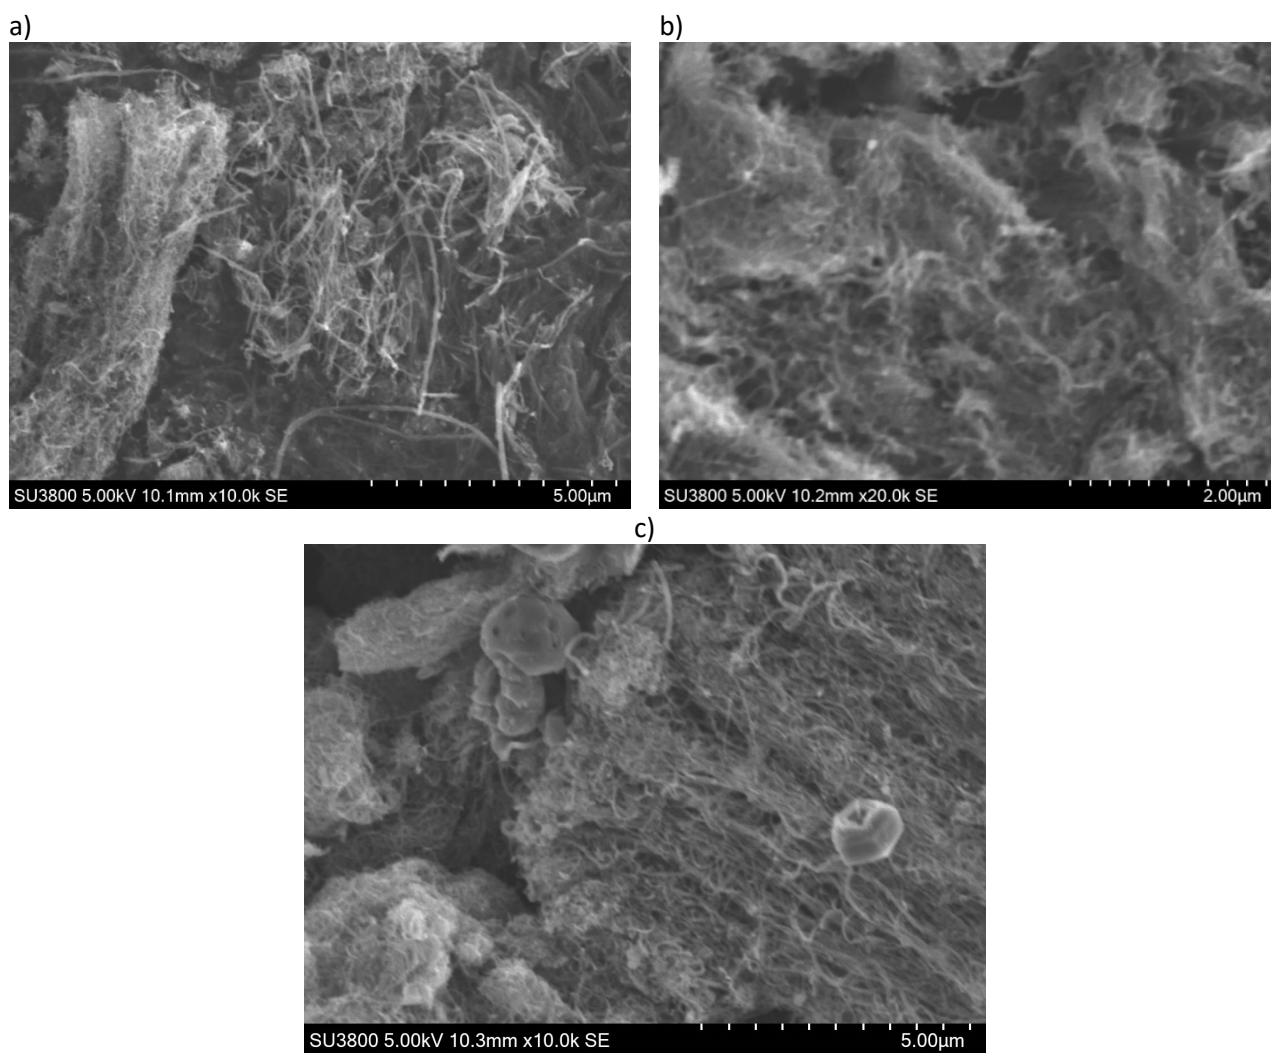

**Figure S5.** SEM micrographs showing a) MWCNT before functionalisation, b) MWCNT-L, c) as-prepared MWCNT-LPd. Recorded on a Hitachi SU3800 instrument.



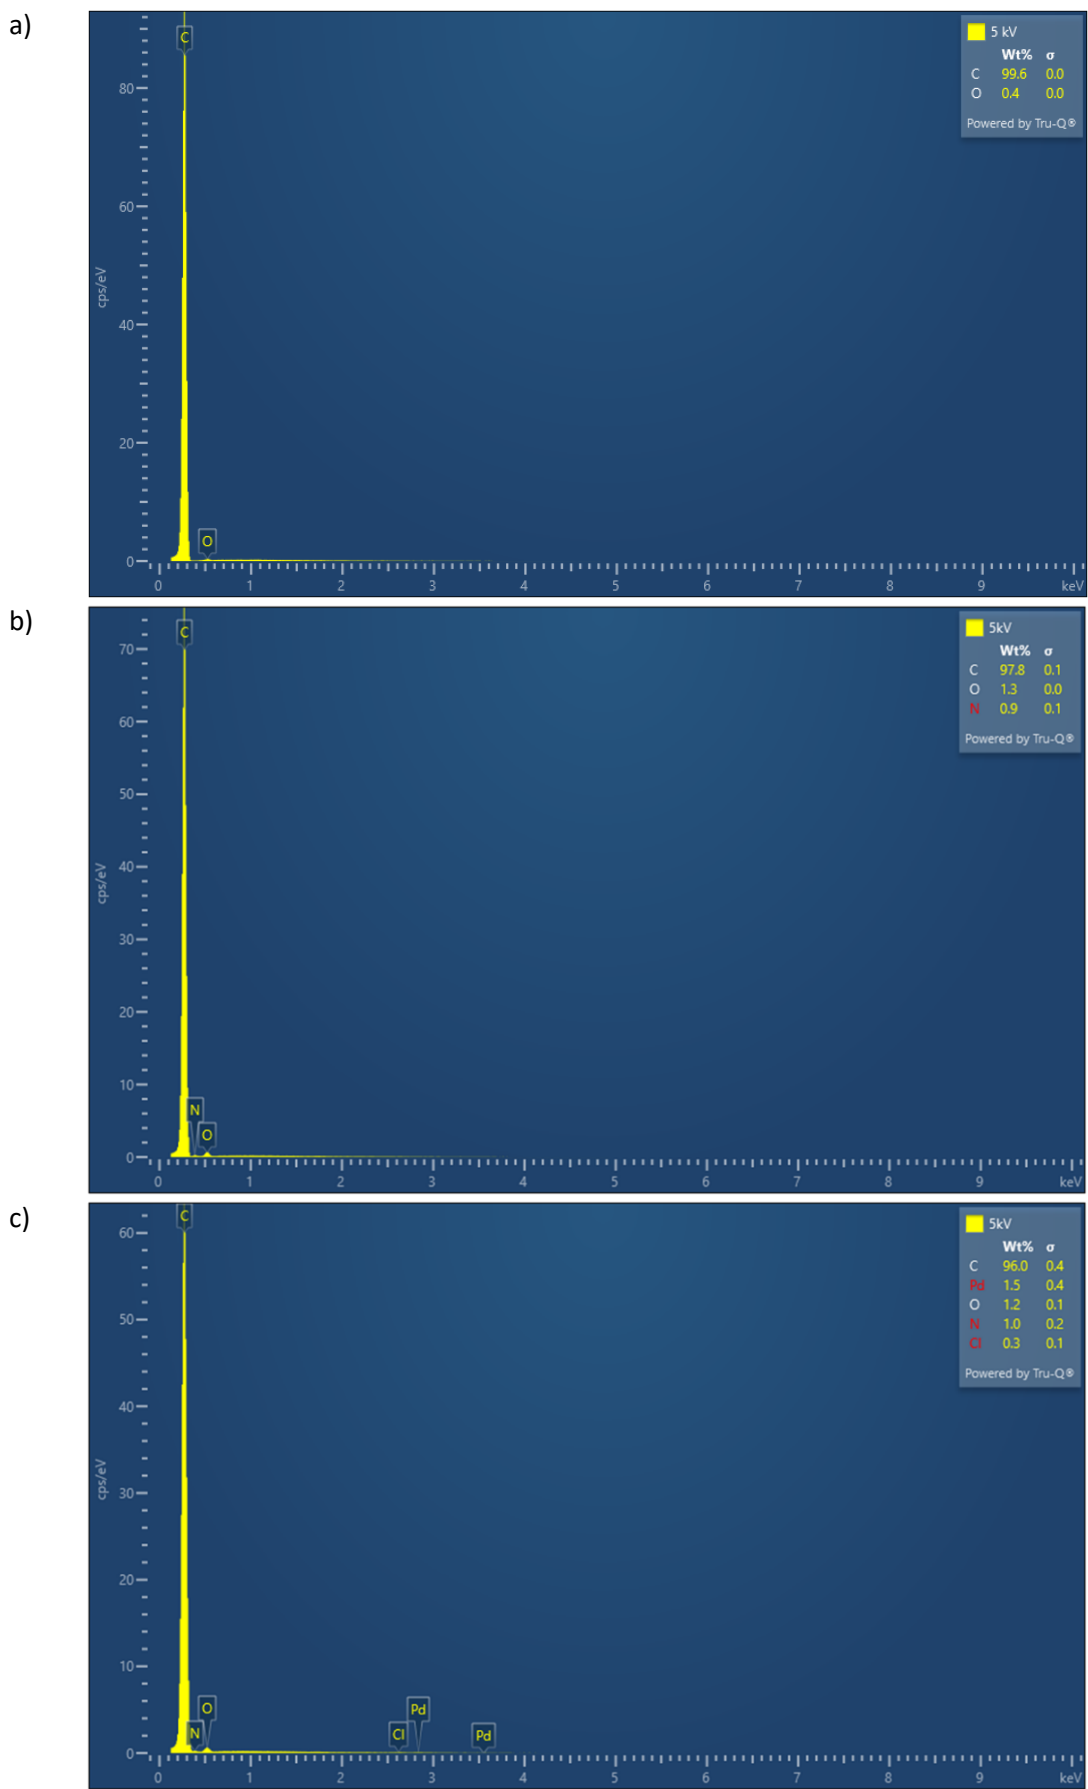

**Figure S6.** SEM-EDS analysis. Spectra and % m/m of a) MWCNT before functionalisation, b) MWCNT-L, c) as-prepared MWCNT-LPd.

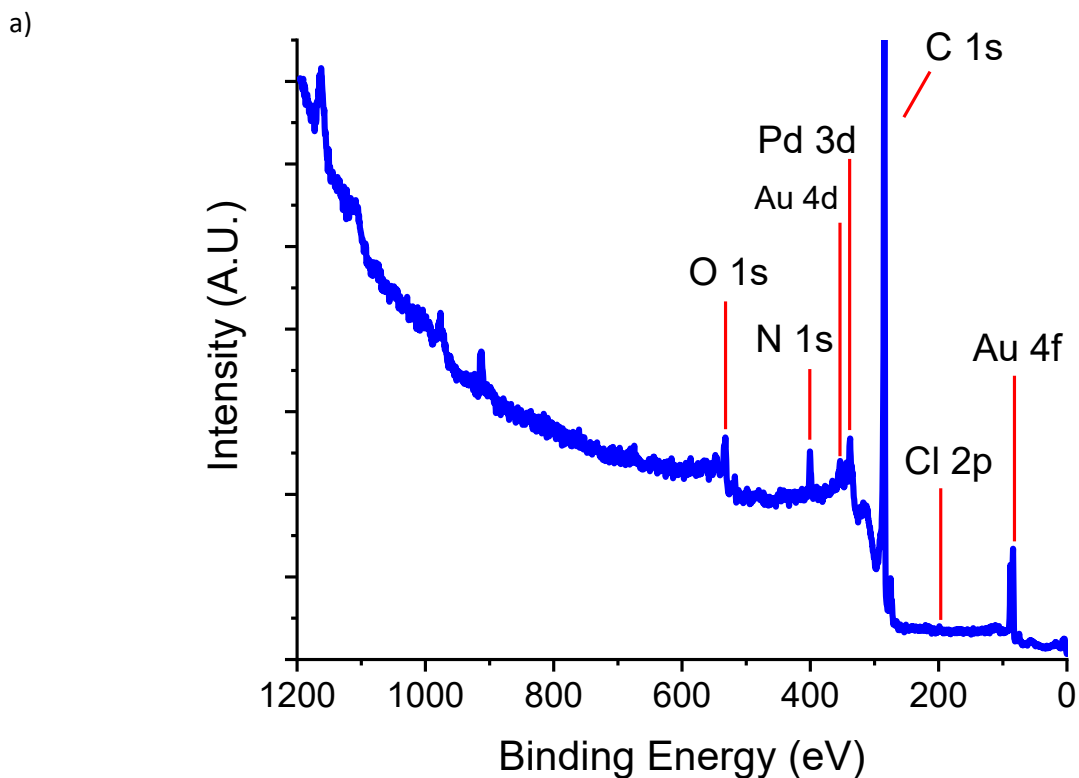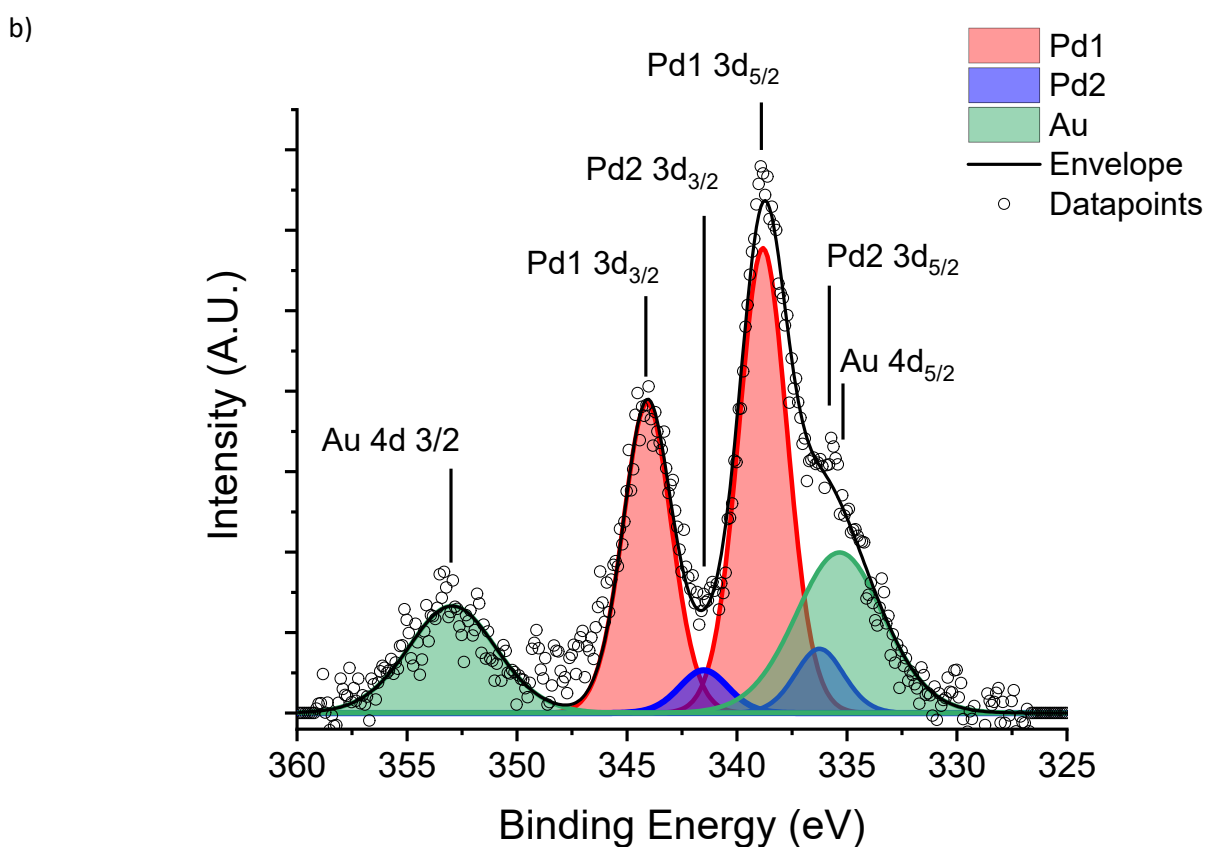

**Figure S7.** XPS Analysis of MWCNT-LPd catalyst. a) XPS survey spectra, b) high resolution XPS spectra in the Pd 3d region deconvoluted into two main components named Pd1 (+2 oxidation state, red colour) and Pd2 (PdO/C, blue colour). Black line: global fit of experimental data; black dot: experimental data, green line corresponds to Au signals from the Au sample holder.

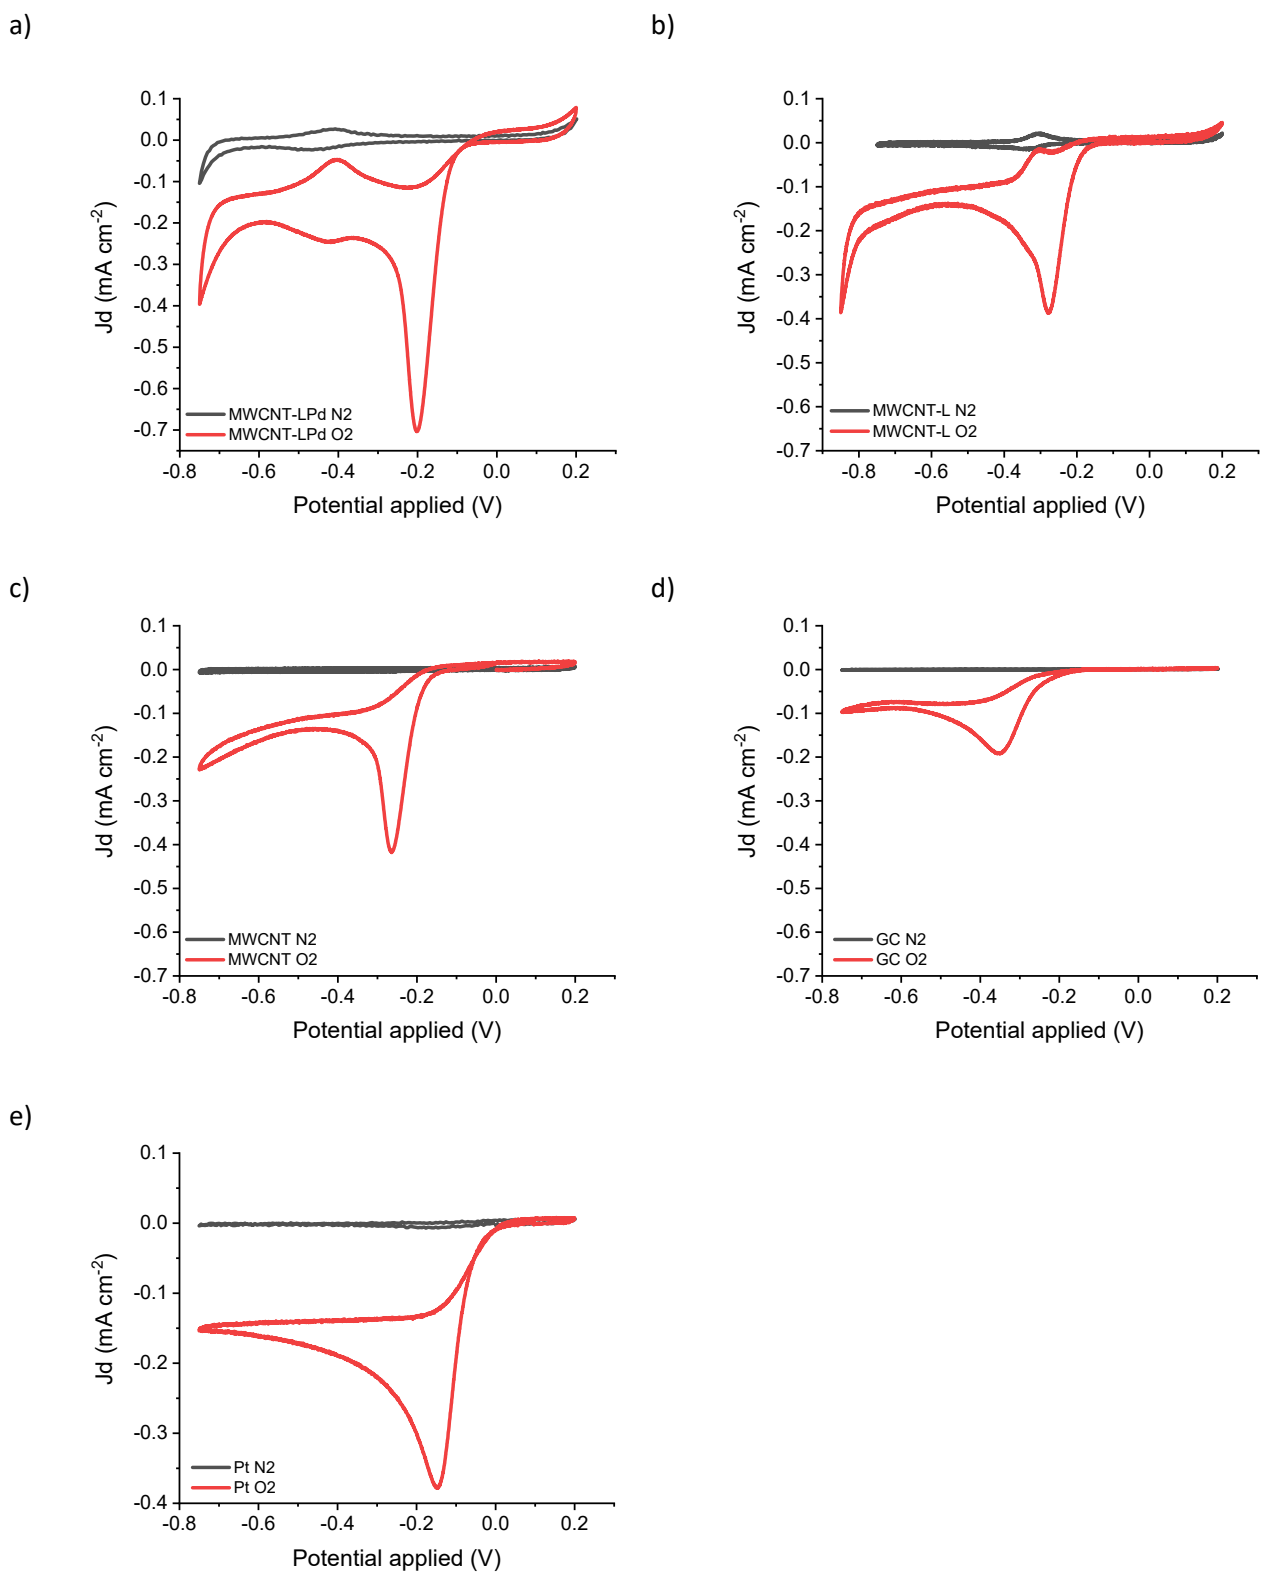

**Figure S8.** Cyclic voltammetry of modified electrodes in  $\text{KOH}$   $0.1\text{M}$  solution saturated with  $\text{N}_2$  (black line) and  $\text{O}_2$  (red line) between  $+0.2$  and  $-0.75$  V at a potential scan rate of  $5 \text{ mVs}^{-1}$  a) MWCNT-LPd, b) MWCNT-L, c) MWCNT, d) benchmark GC electrode, e) benchmark Pt electrode.

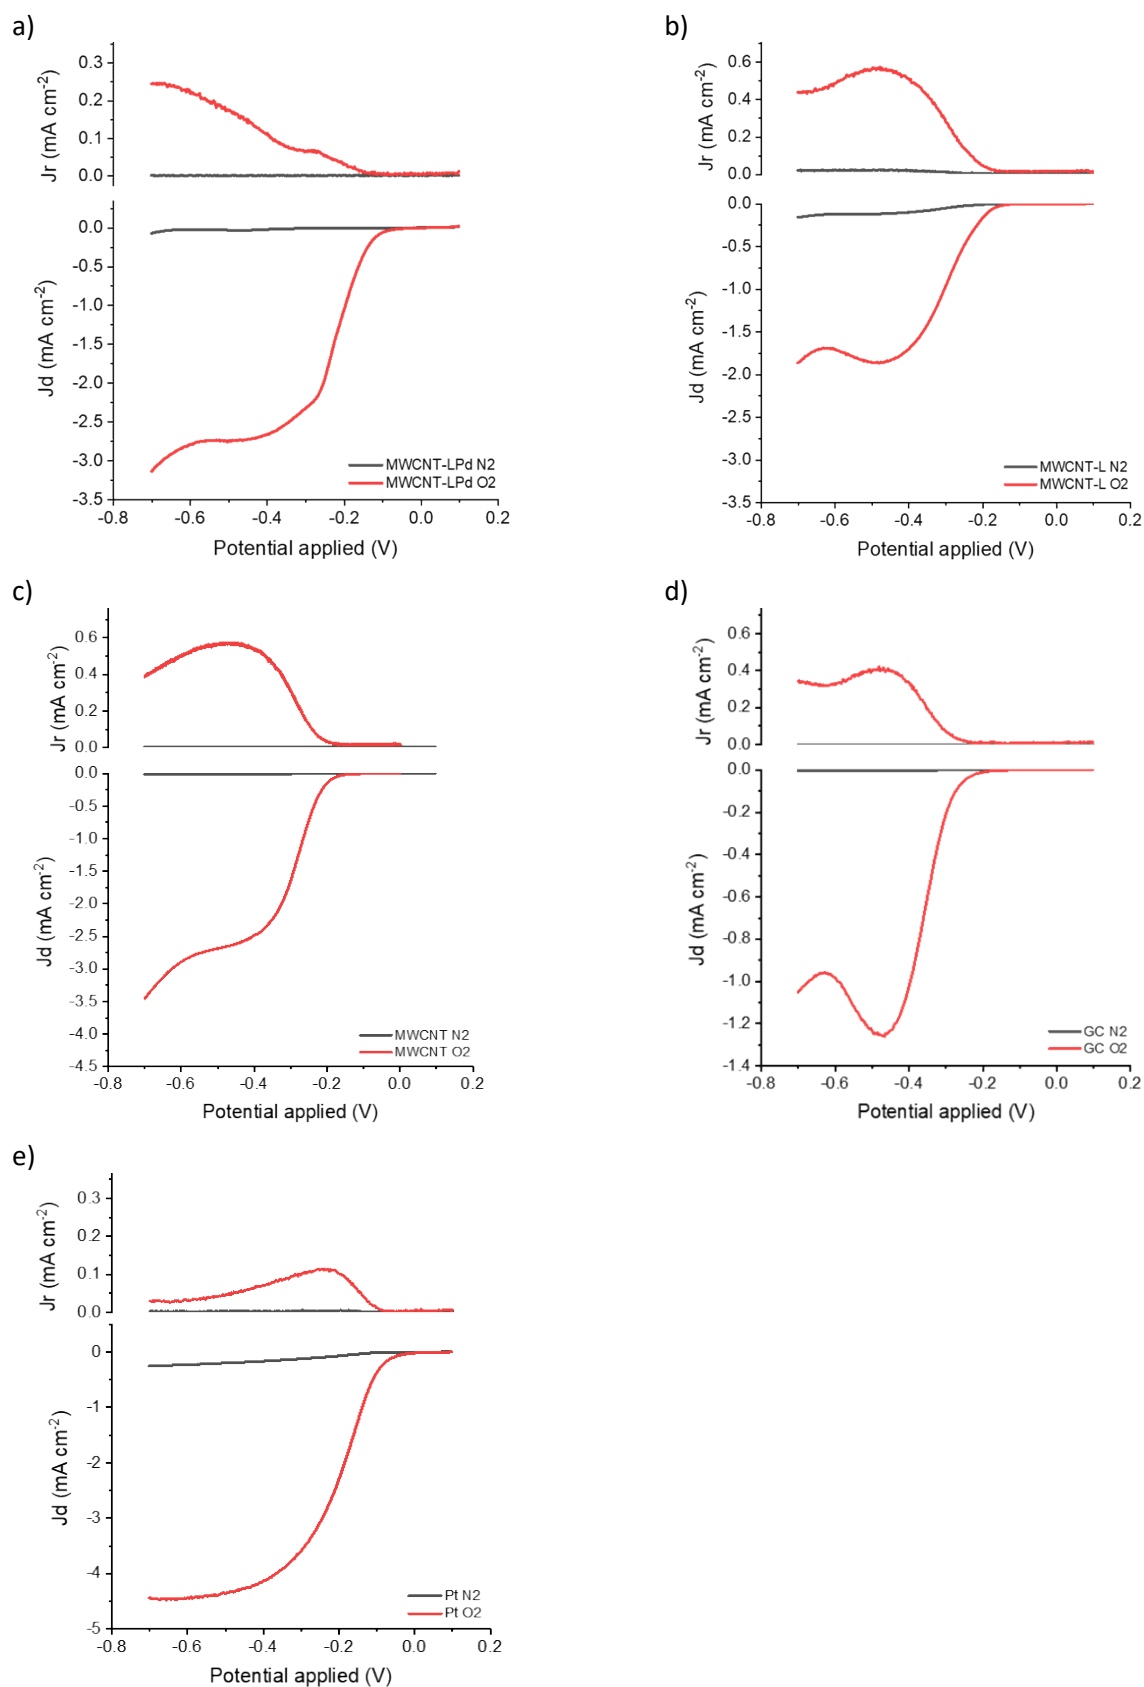

**Figure S9.** LSV ring and disk current density, 1600 rpm rotation rate, 5 mVs<sup>-1</sup> scan rate, in KOH 0.1 M N<sub>2</sub> and O<sub>2</sub> saturated solution. a) MWCNT-LPd, b) MWCNT-L, c) MWCNT, d) benchmark GC electrode, e) benchmark Pt electrode.

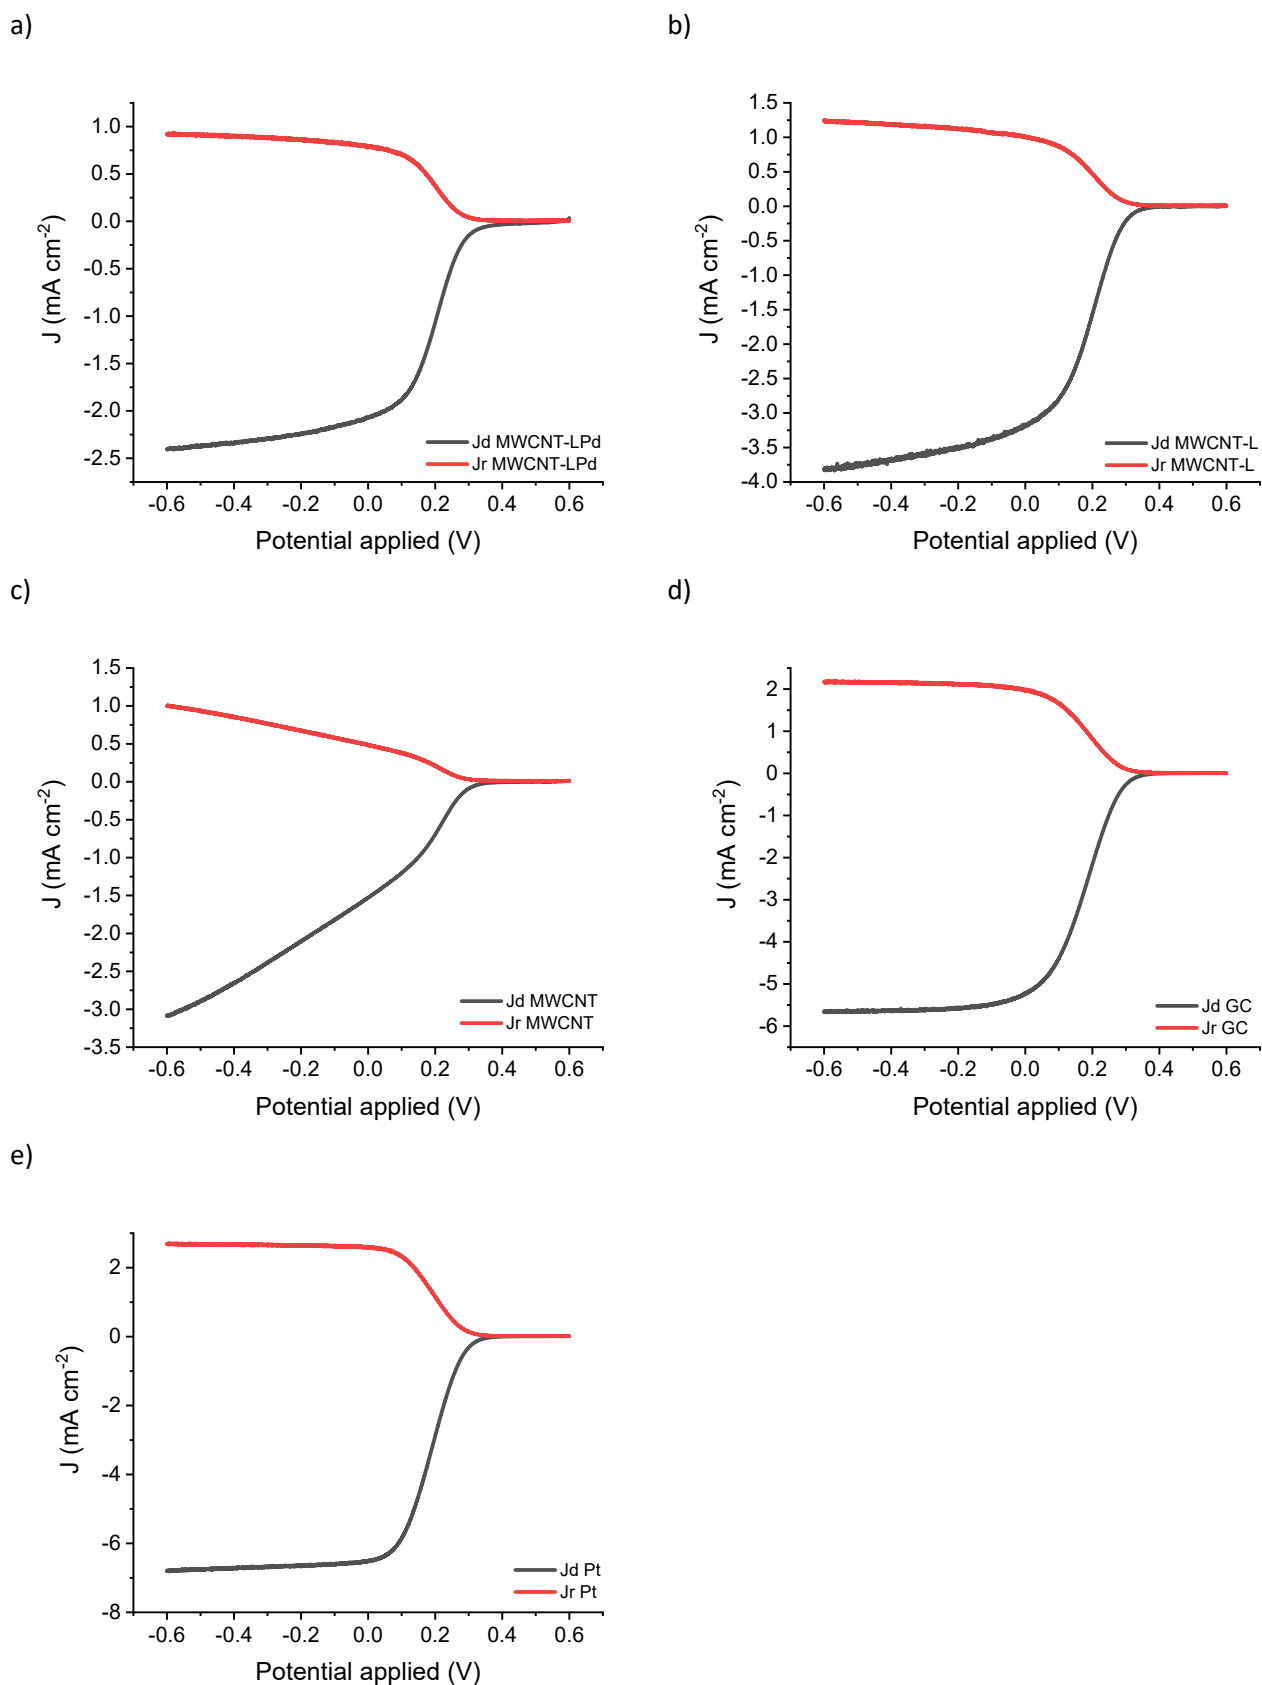

**Figure S10.** LSV ring and disk current density, 1600 rpm rotation rate, 5 mVs<sup>-1</sup> scan rate, in K<sub>3</sub>Fe(CN)<sub>6</sub> 1mM, KCl 0.1 M O<sub>2</sub> free solution. a) MWCNT-LPd (N = 0.38), b) MWCNT-L (N = 0.32), c) MWCNT (N = 0.32), d) benchmark GC electrode (N = 0.38), e) benchmark Pt electrode (N = 0.38).

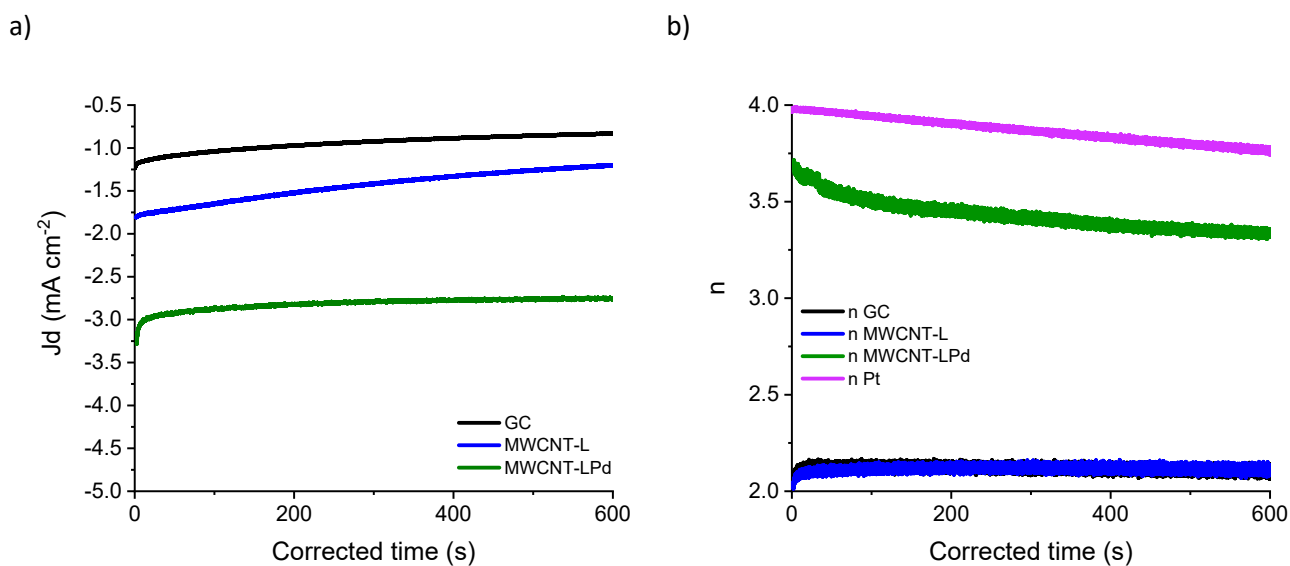

**Figure S11.** Short-time stability test (galvanostatic RRDE experiment) of ORR electrocatalytic performance. Disk potential  $-0.60$  V, ring potential  $+0.50$  V, 1600 rpm rotation rate in KOH 0.1 M  $\text{O}_2$  saturated solution. a) disk currents density of modified GC electrodes and benchmark electrodes b) number of exchanged electrons per  $\text{O}_2$  molecule over time.
